# Supplementary material for: Human induced-T-to-natural killer cells have potent anti-tumour activities
Source: PubMed Central journal article supplement (PMC8943975; doi:10.1186/s40364-022-00358-4), 2022-03-24

# Supplementary figure 1

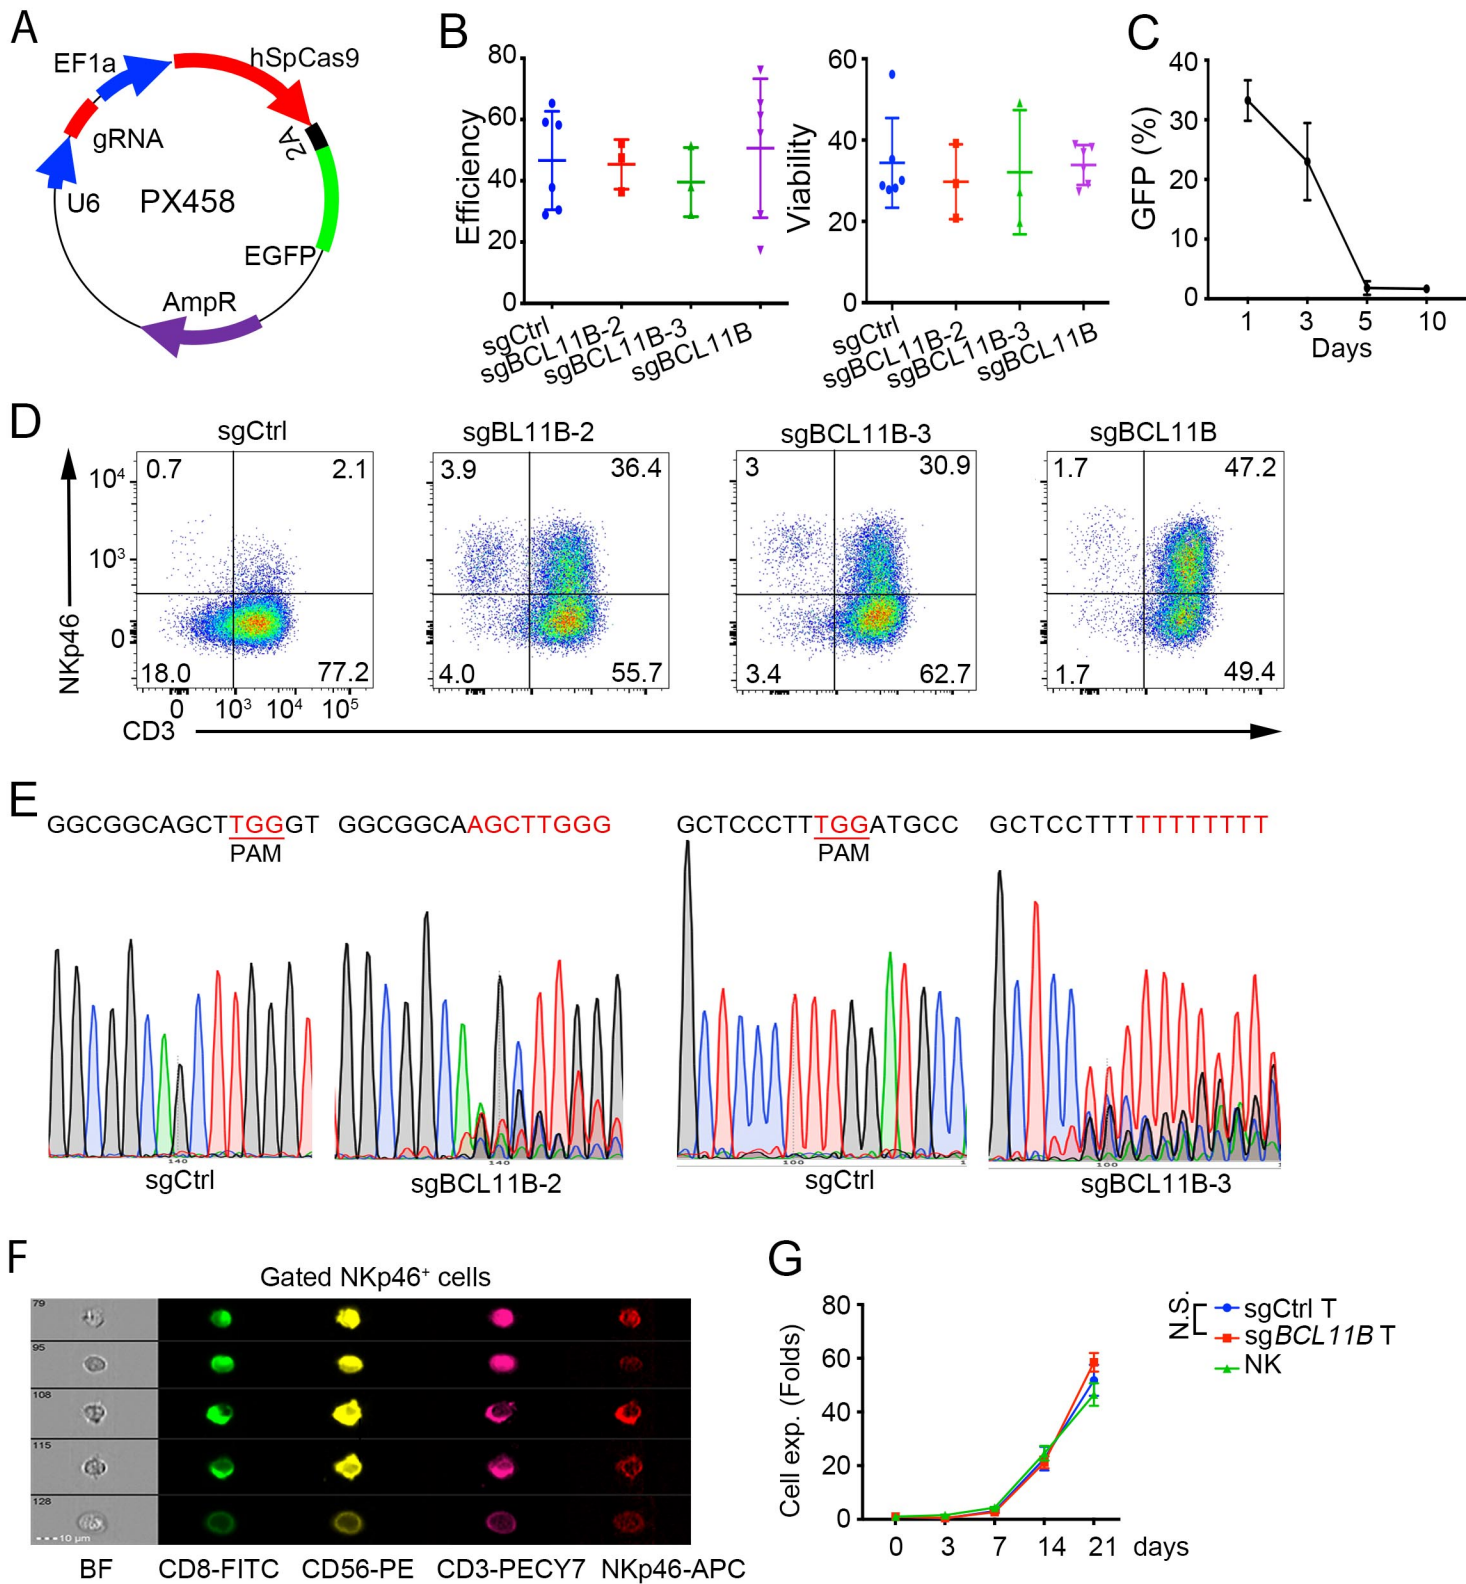

# Supplementary figure 2

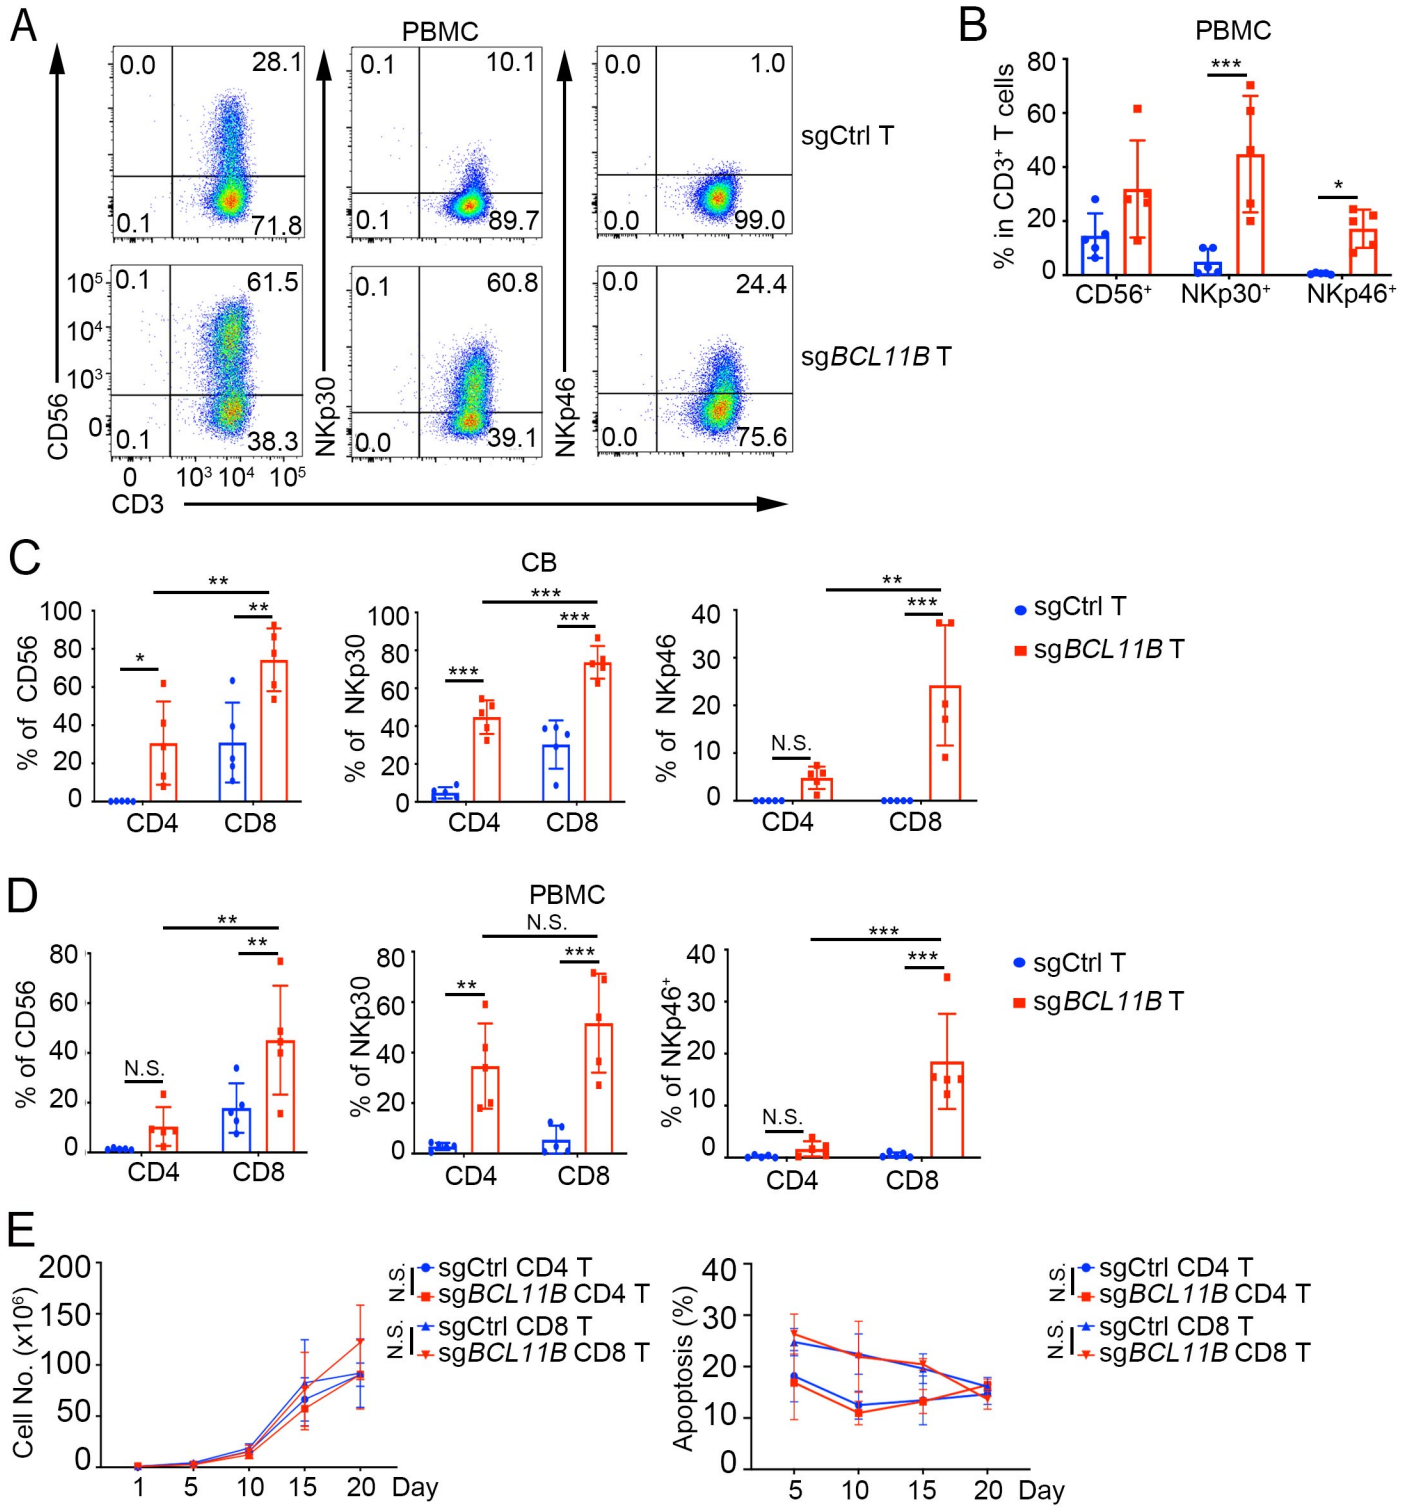

# Supplementary figure 3

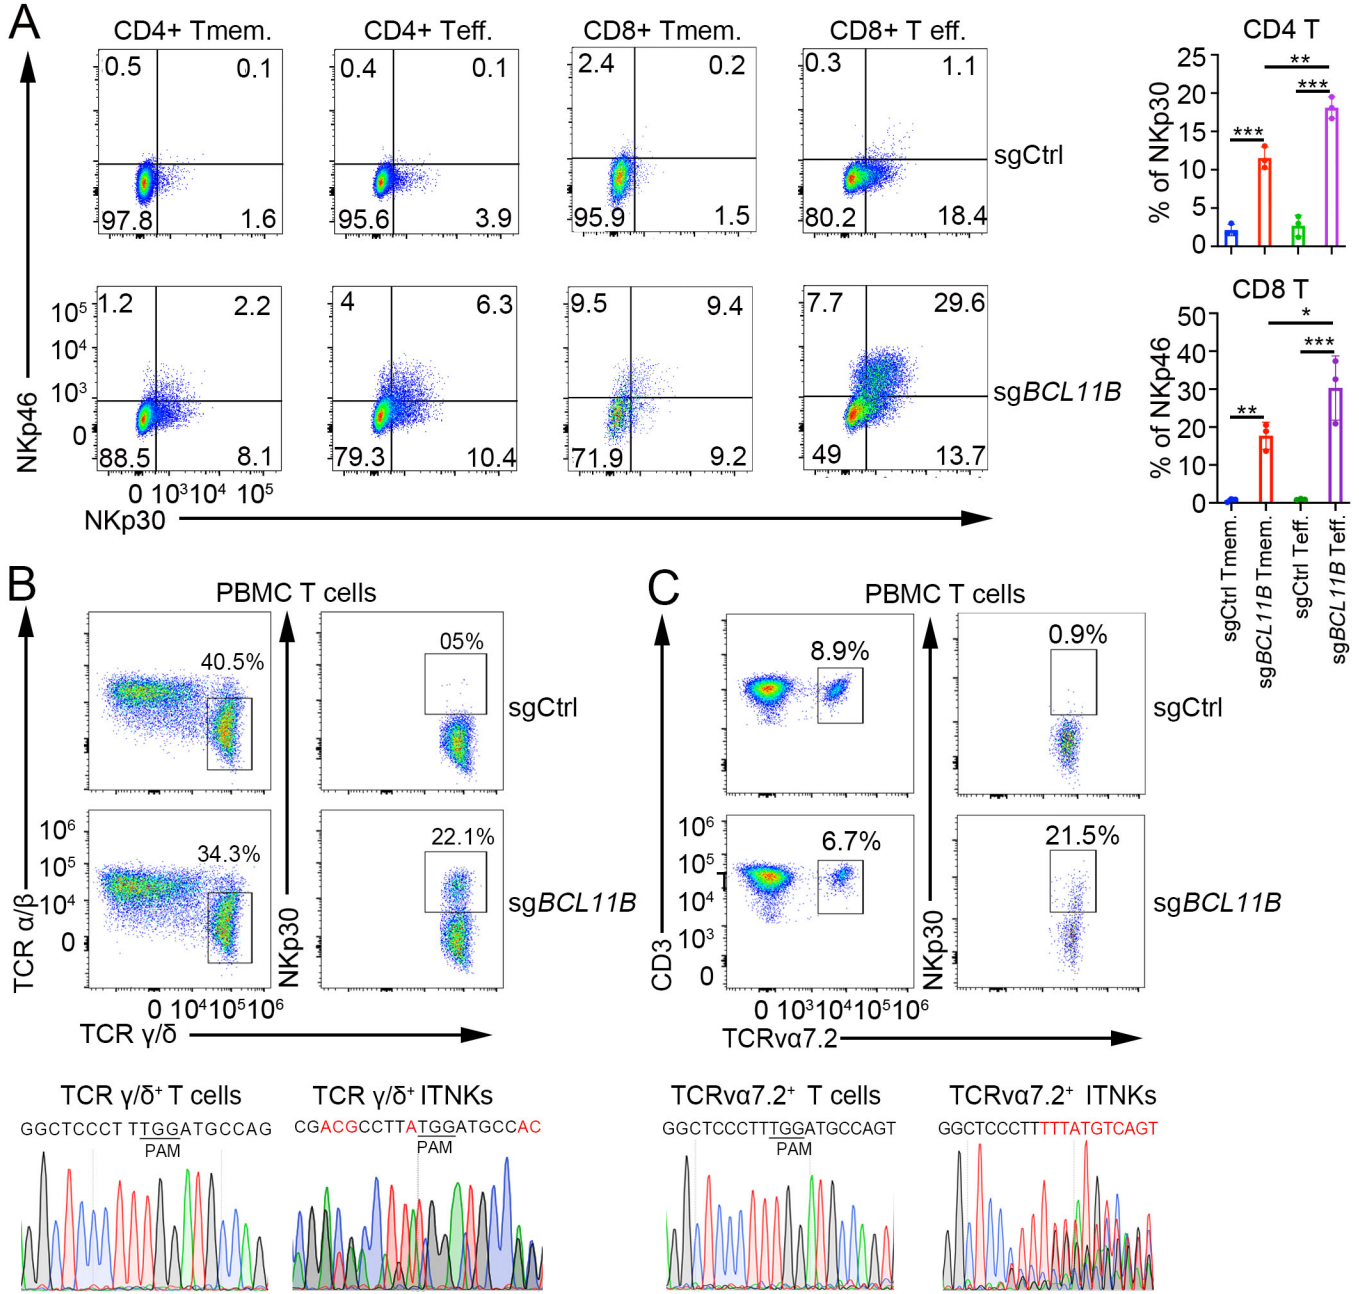

# Supplementary figure 4

## A

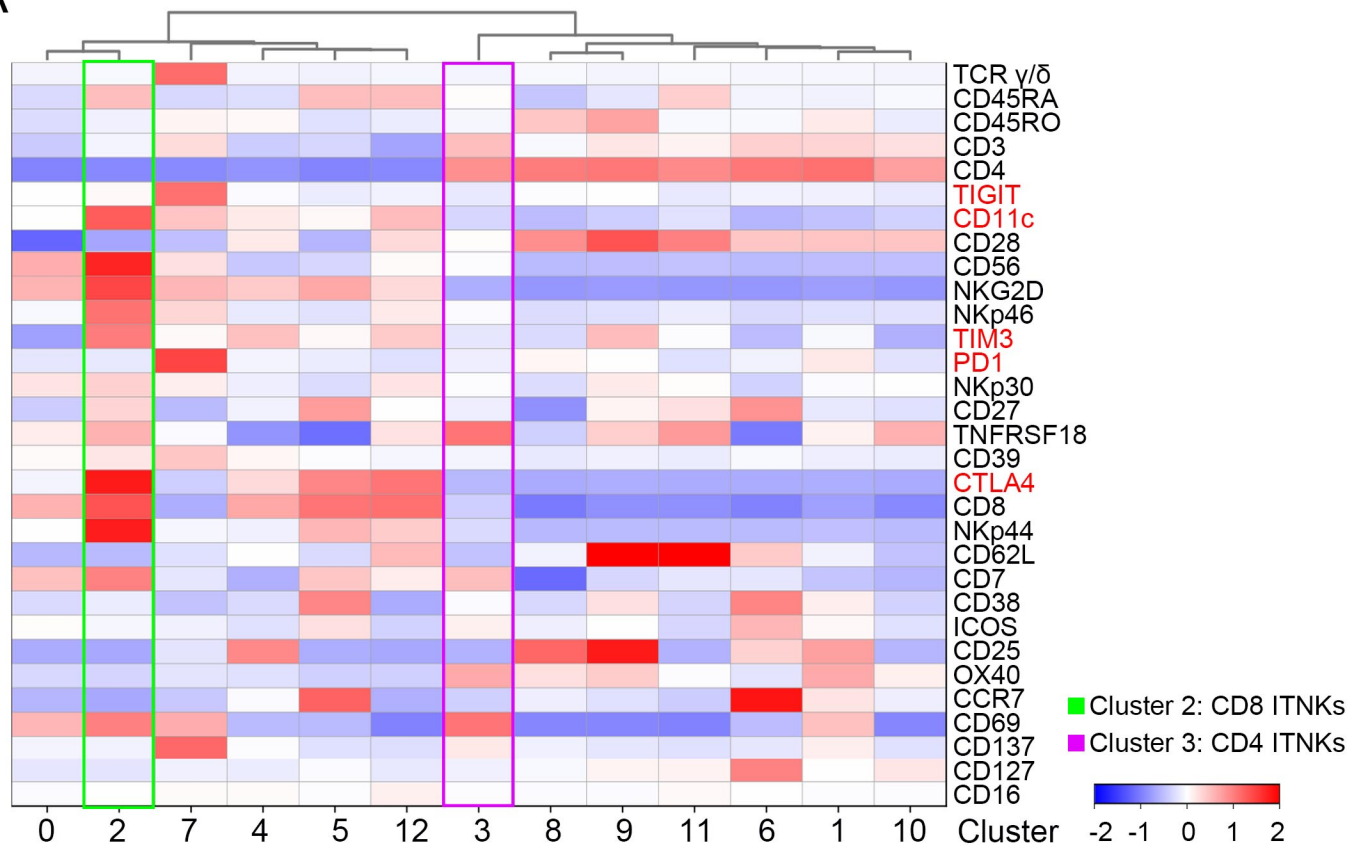

## B

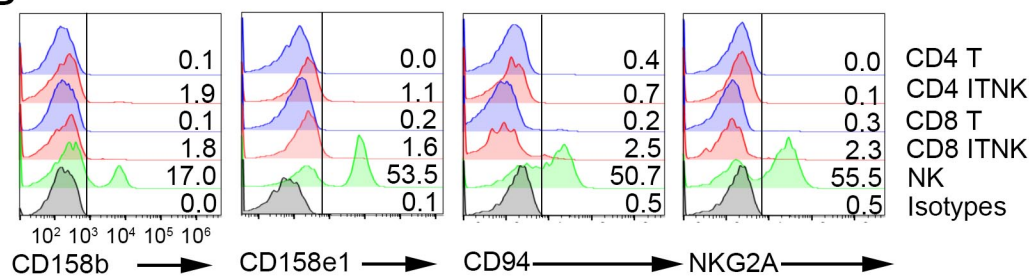

## C

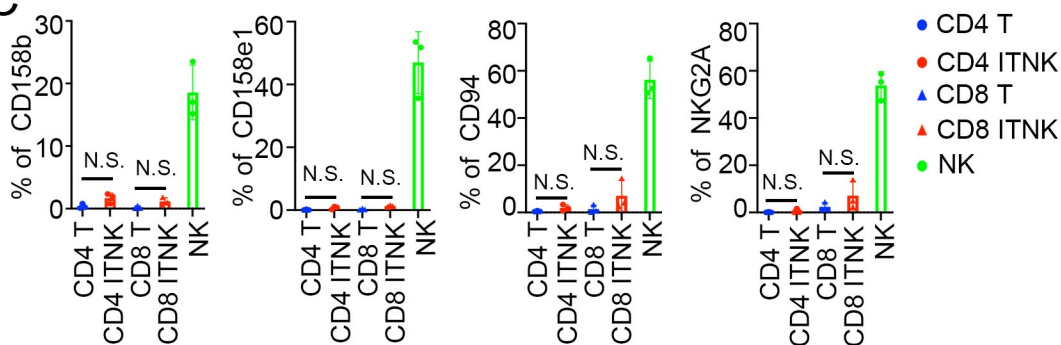

# Supplementary figure 5

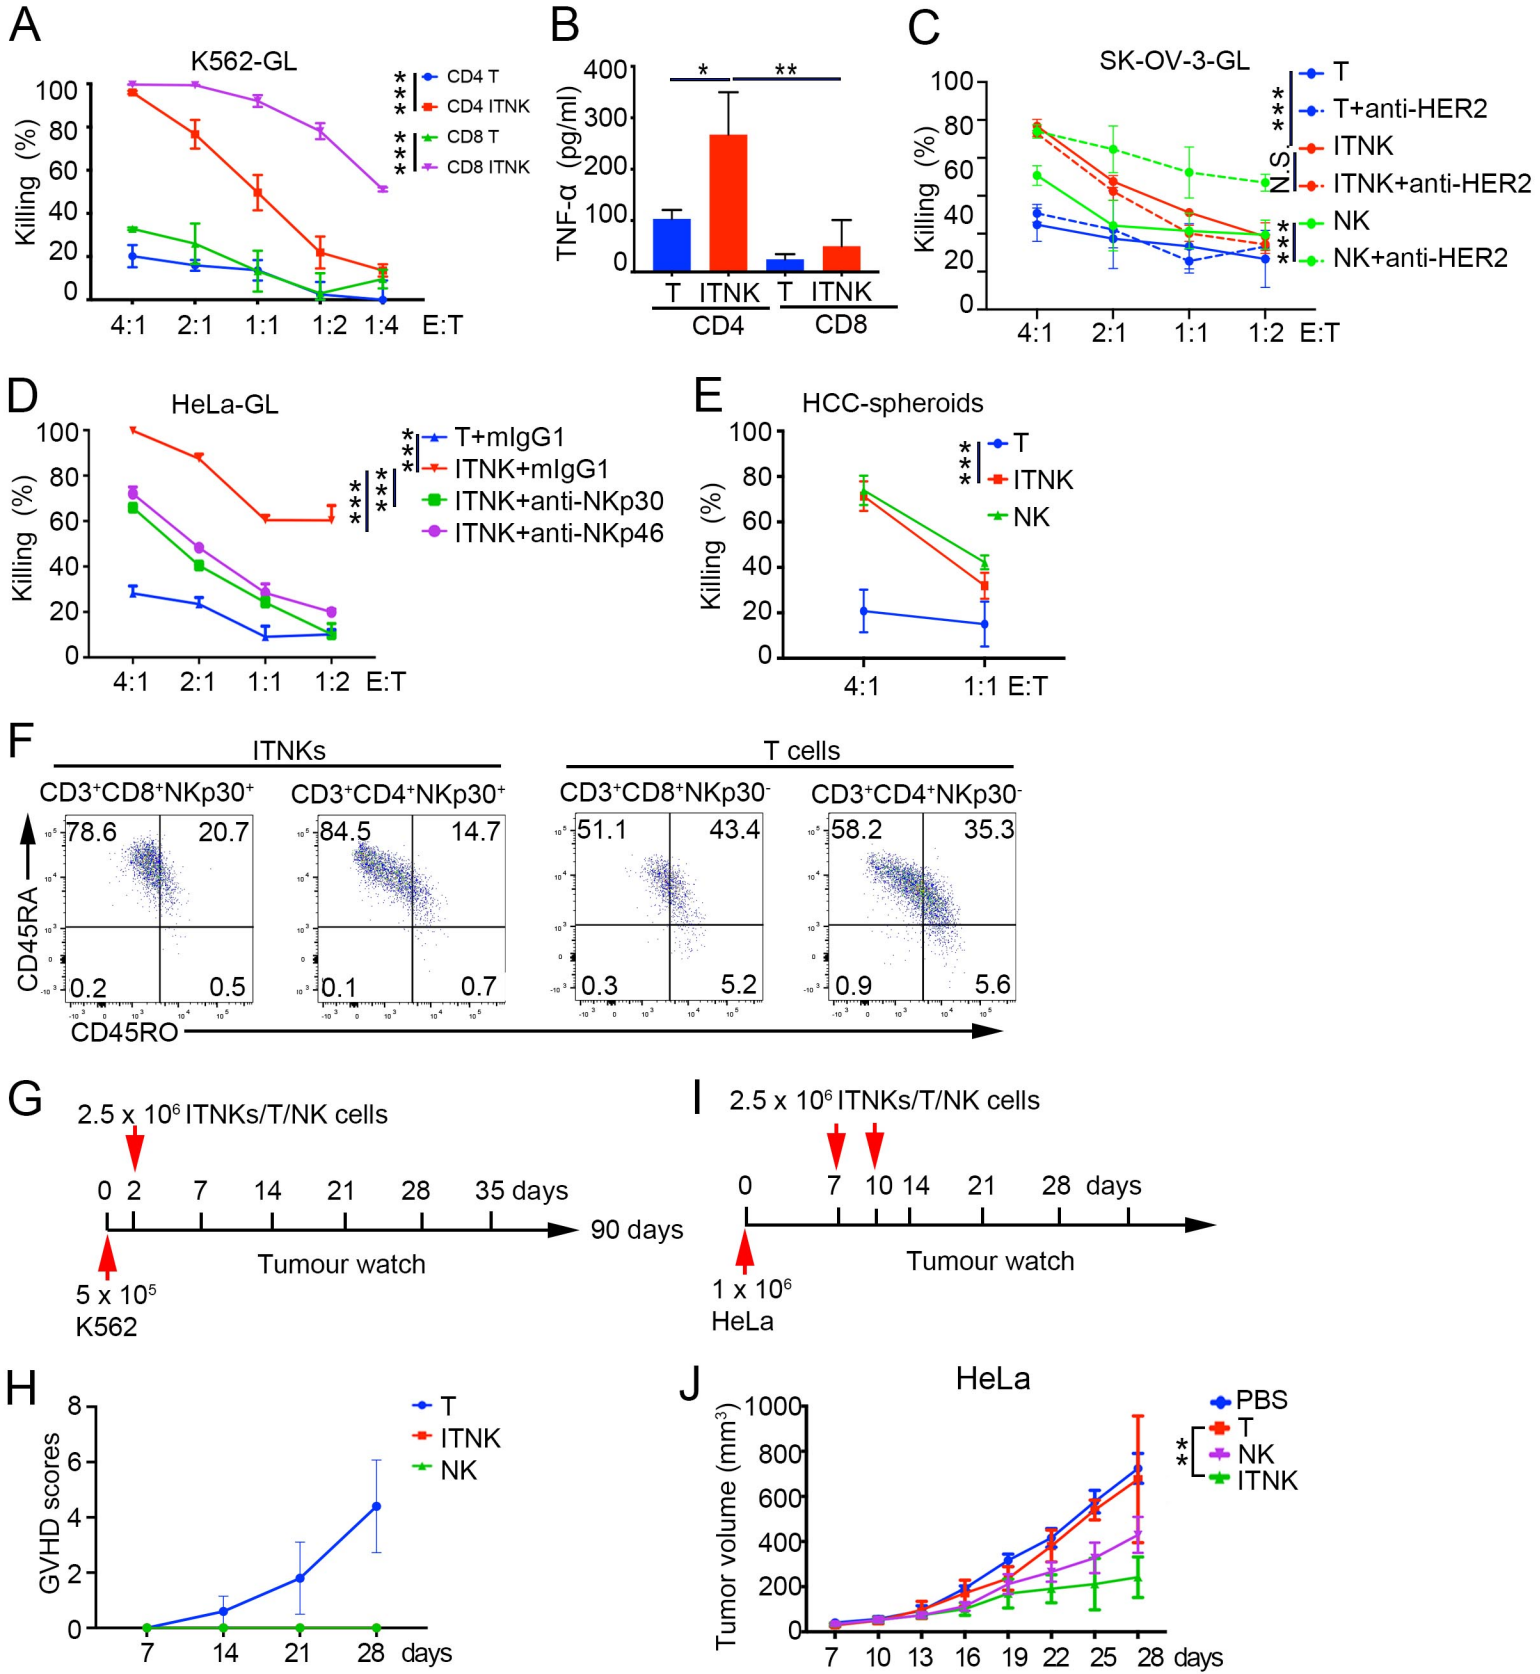

# Supplementary figure 6

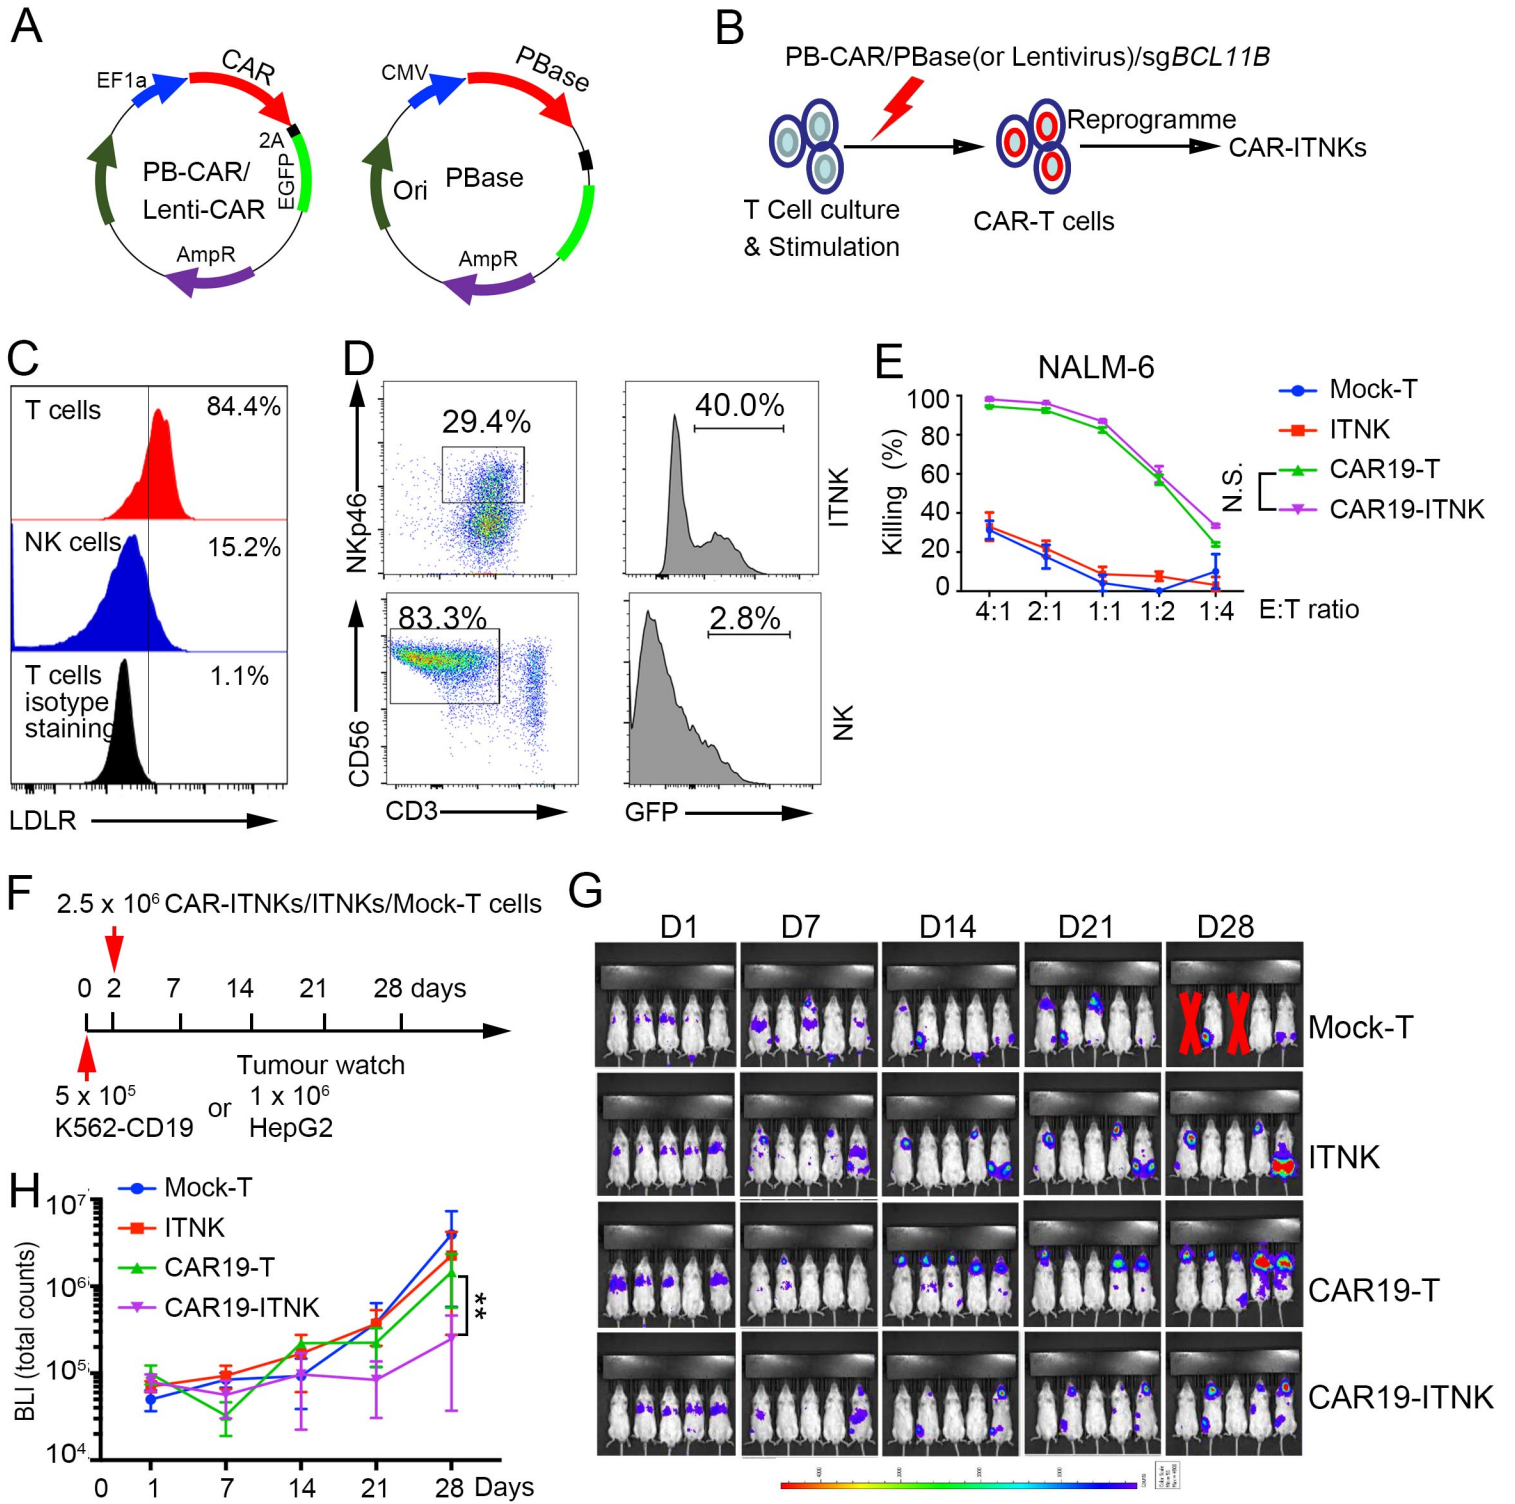

# Supplementary figure 7

**A**

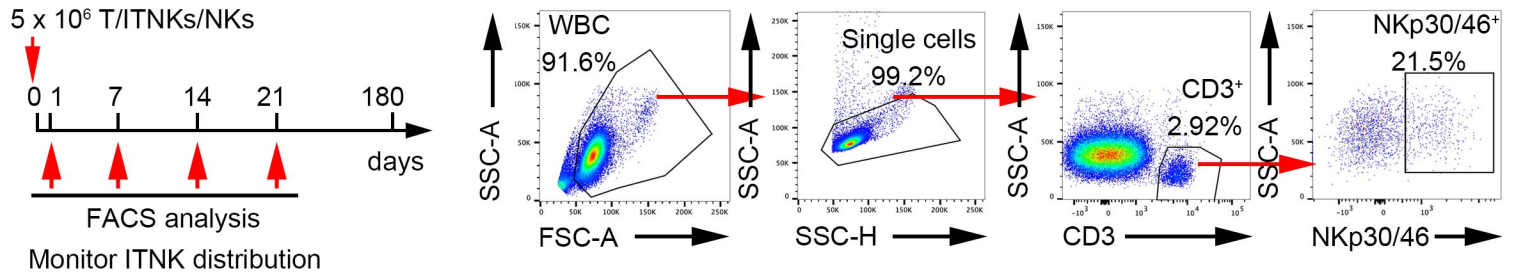

**B**

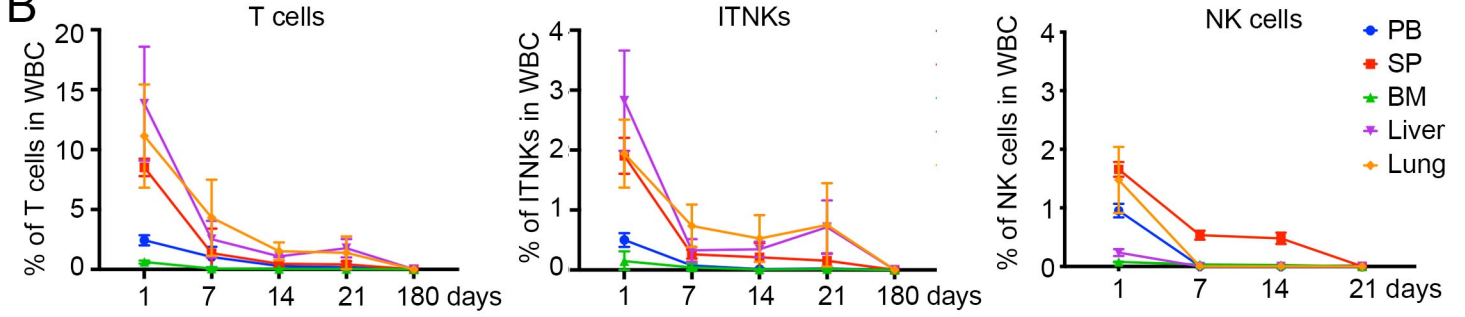

**C**

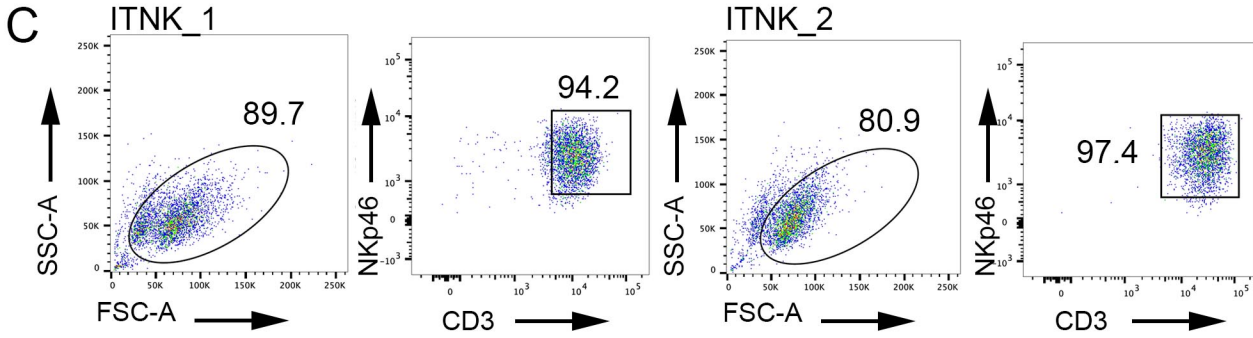

**D**

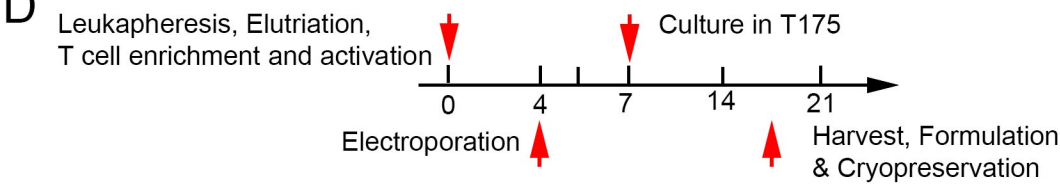

# Supplementary figure 8

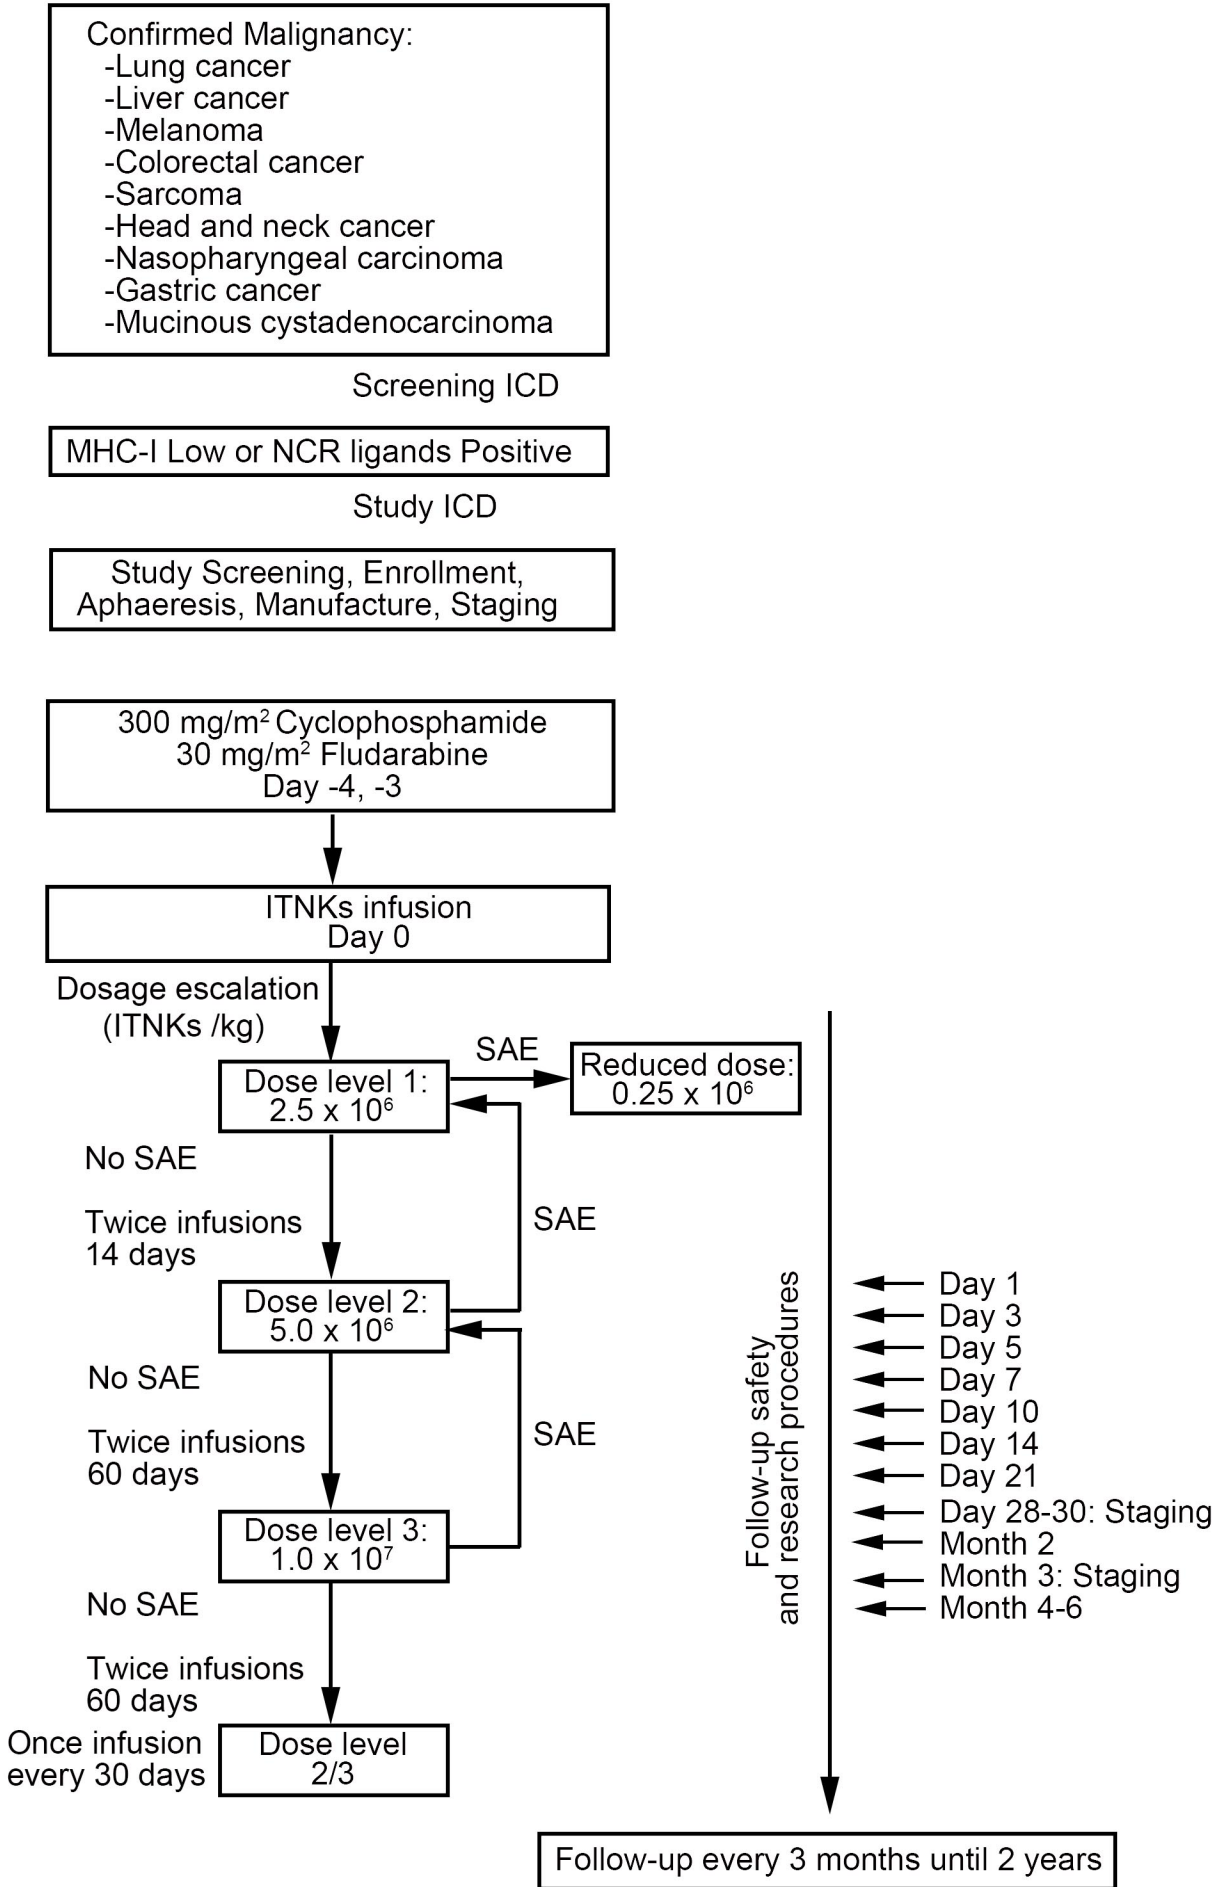



## Supplementary figure 9

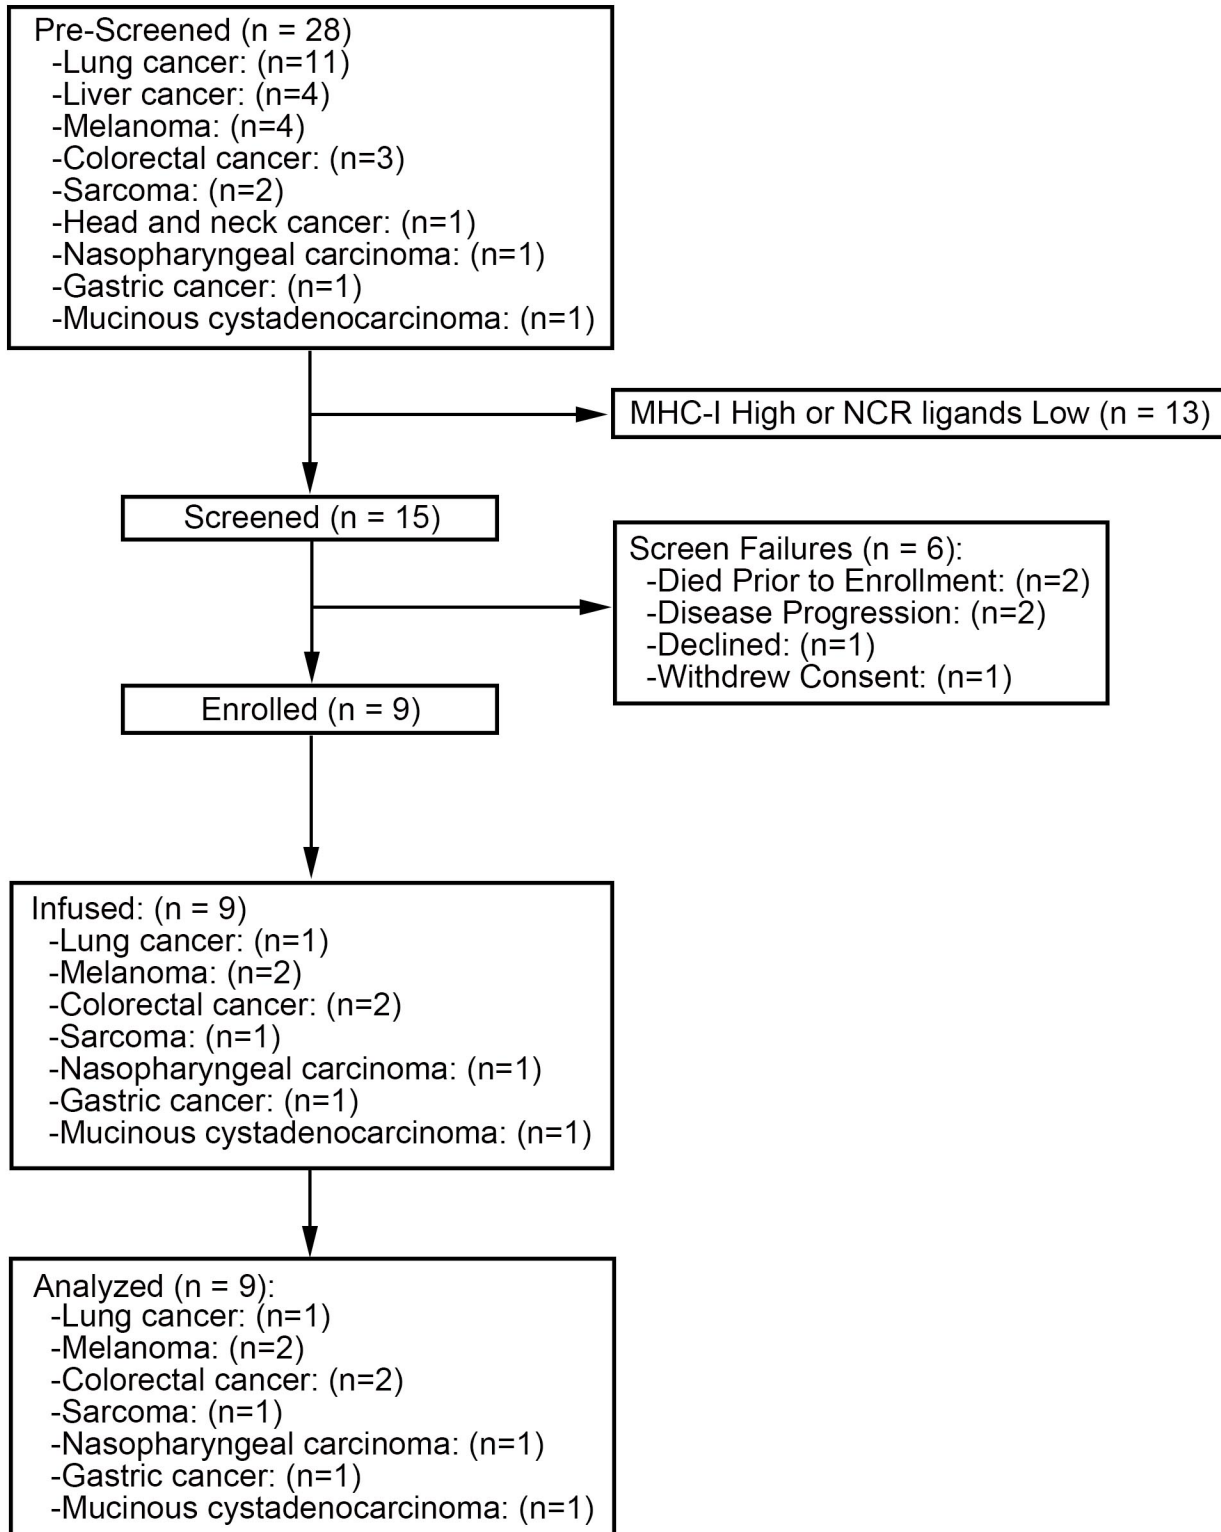

# Supplementary figure 10

**A**

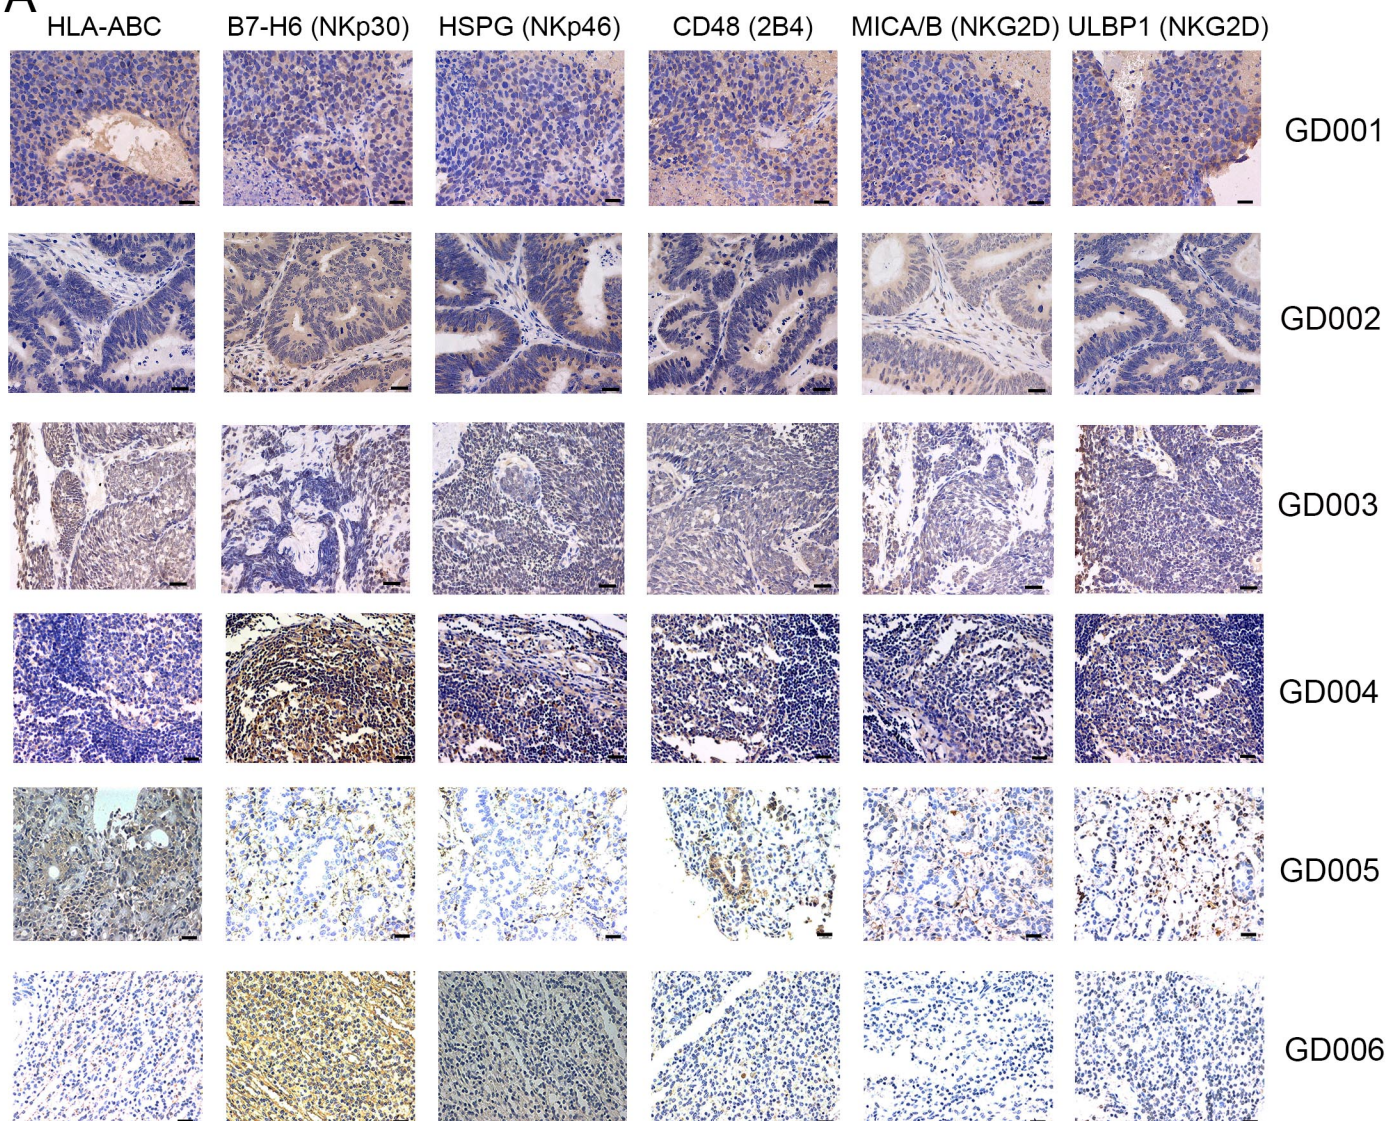

**B**

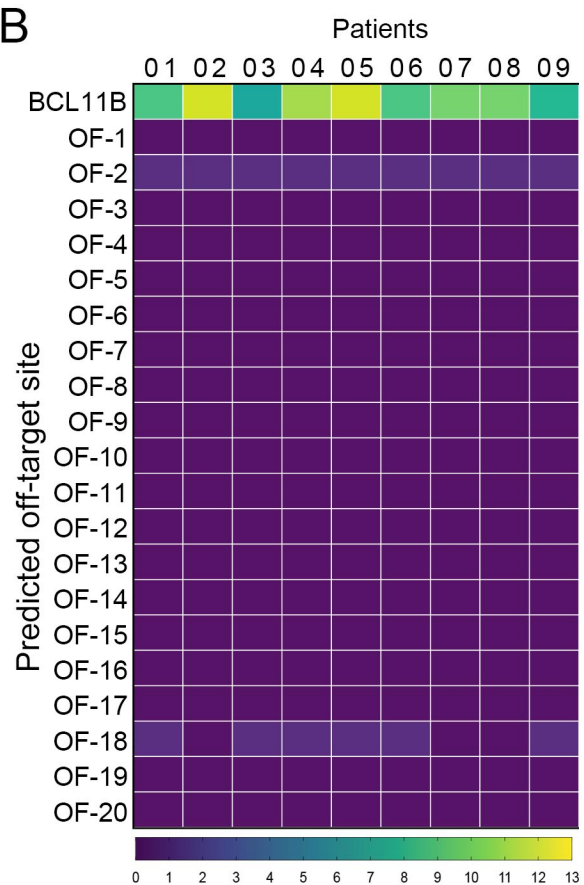

**C**

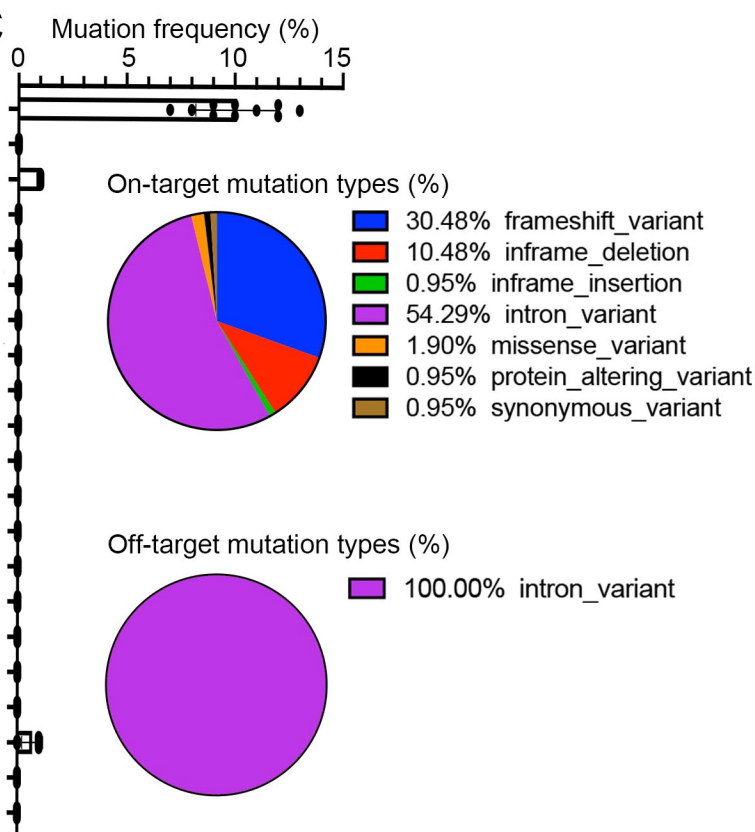

# Supplementary figure 11

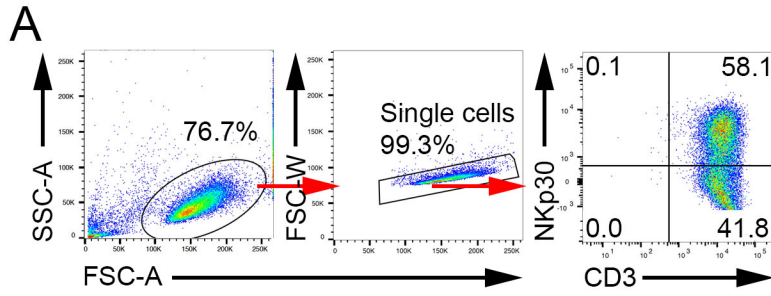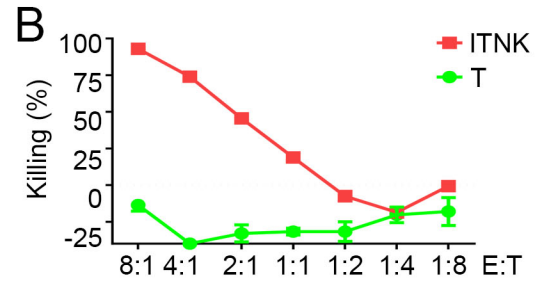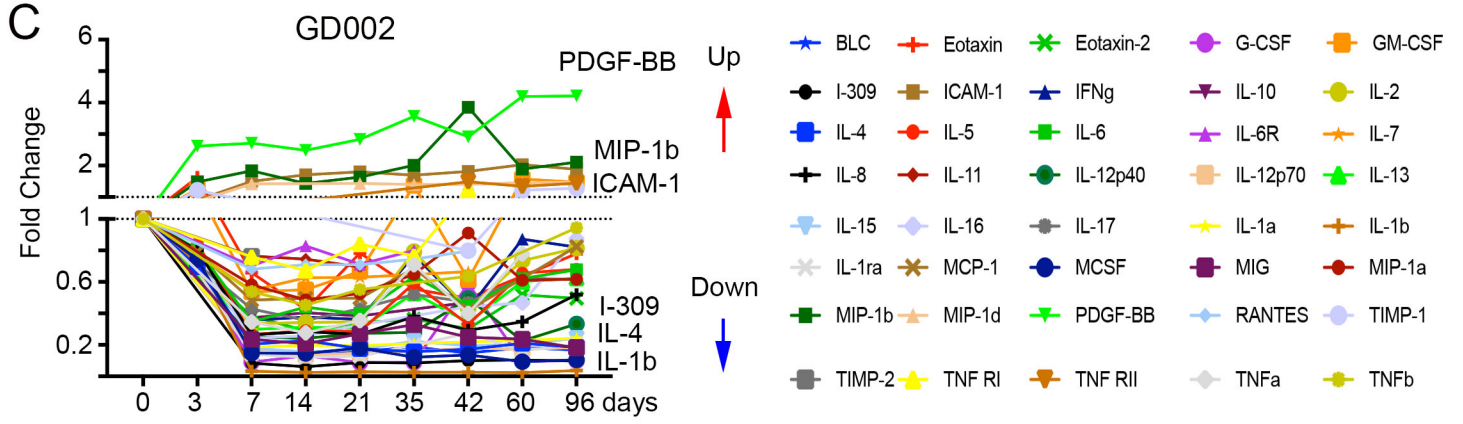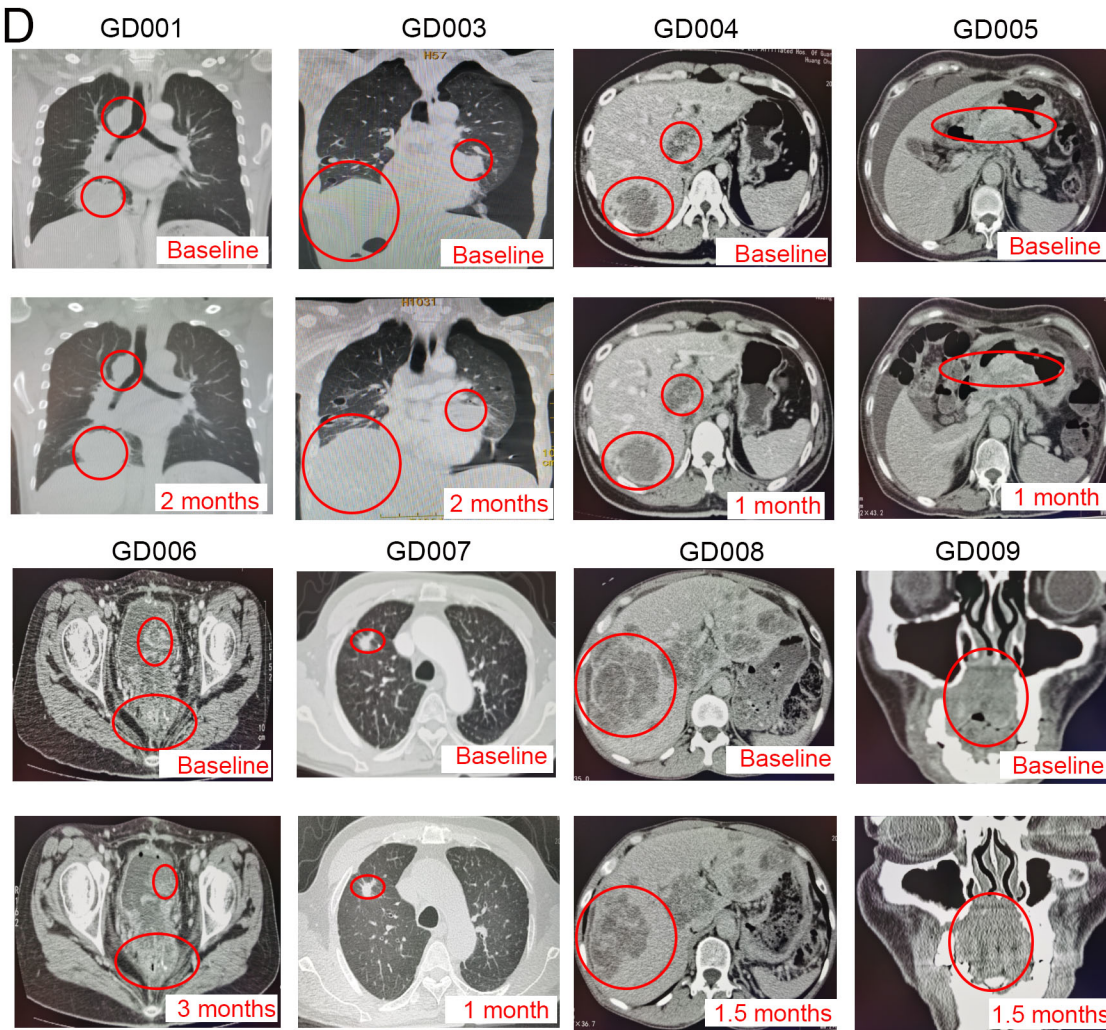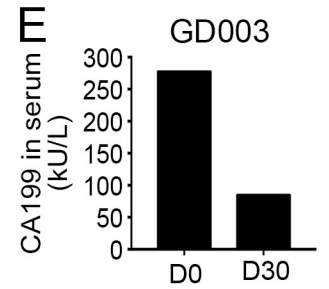

Supplement: 40364_2022_358_MOESM11_ESM.pdf [file 40364_2022_358_MOESM11_ESM.pdf]
